# Supplementary material for: Liraglutide Has Anti-Inflammatory and Anti-Amyloid Properties in Streptozotocin-Induced and 5xFAD Mouse Models of Alzheimer’s Disease
Source: MDPI journal article supplement (doi:10.3390/ijms22020860), 2021-01-16

## Supplementary material:

Figure 4 (B) 6E10 (Cortex)

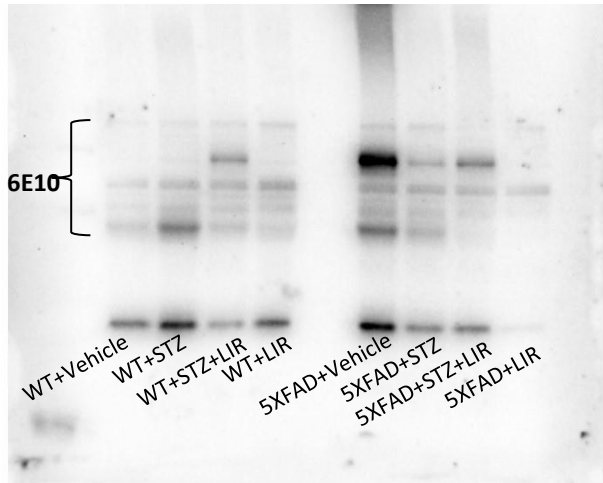

Figure 4 (B) GAPDH (Cortex)

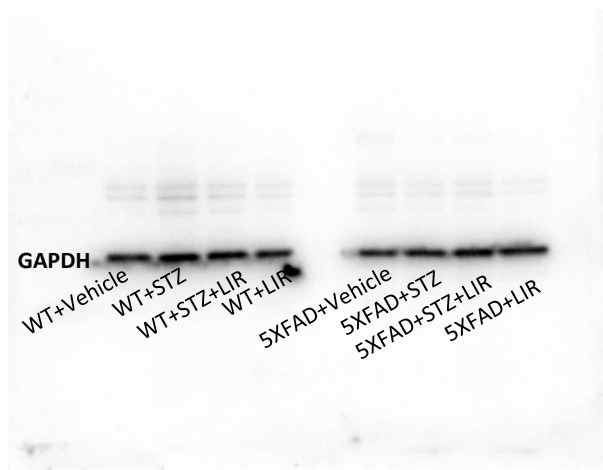

Figure 4 (E) 6E10 (Hippocampus)

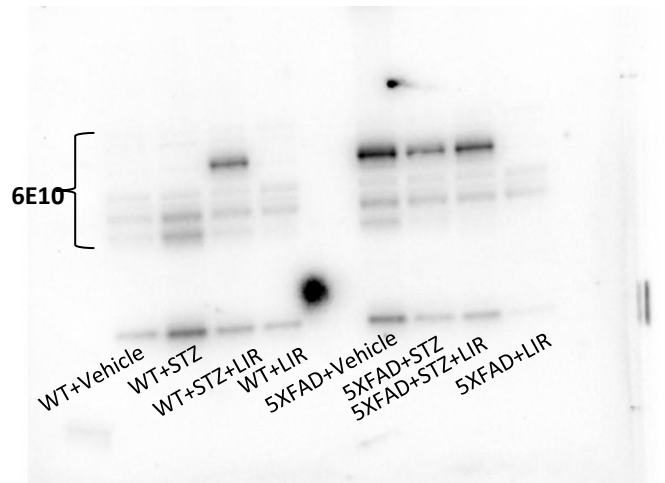

Figure 4 (E) GAPDH (Hippocampus)

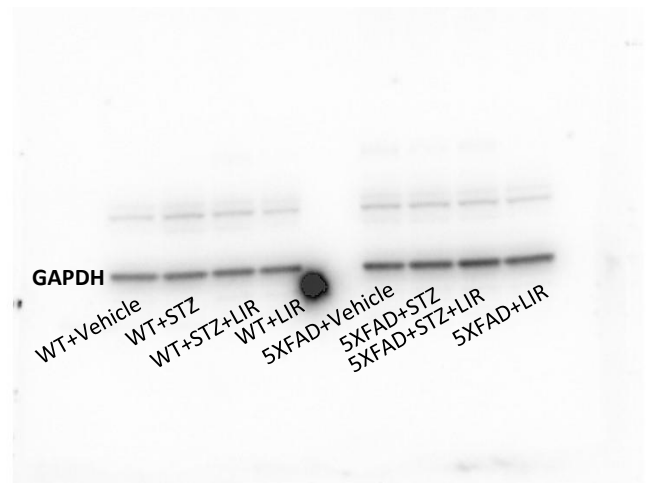

Figure 5 (A) IDE (Cortex)

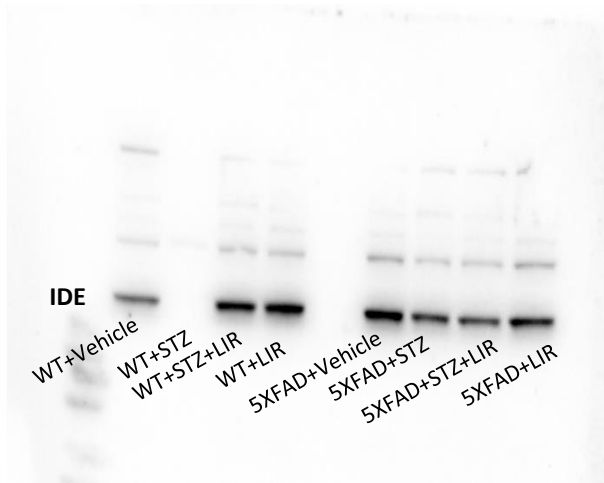

Figure 5 (A) IR (Cortex)

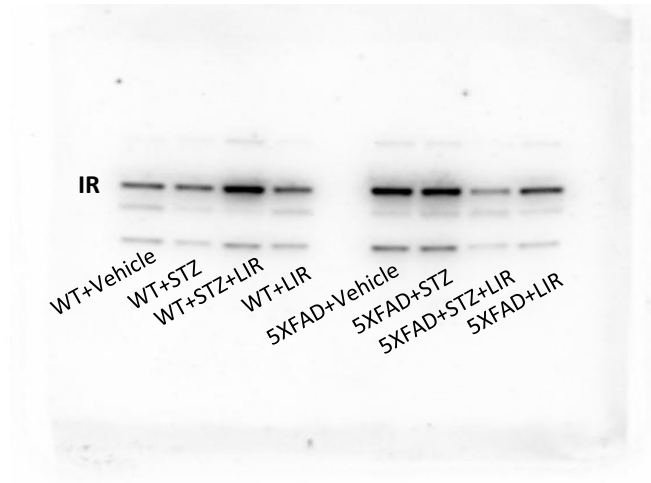

Figure 5 (A) pIR (Cortex)

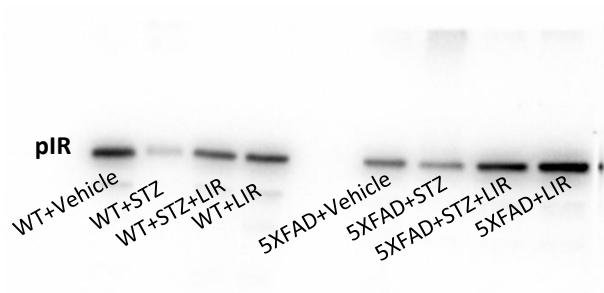

Figure 5 (B) IDE (Hippocampus)

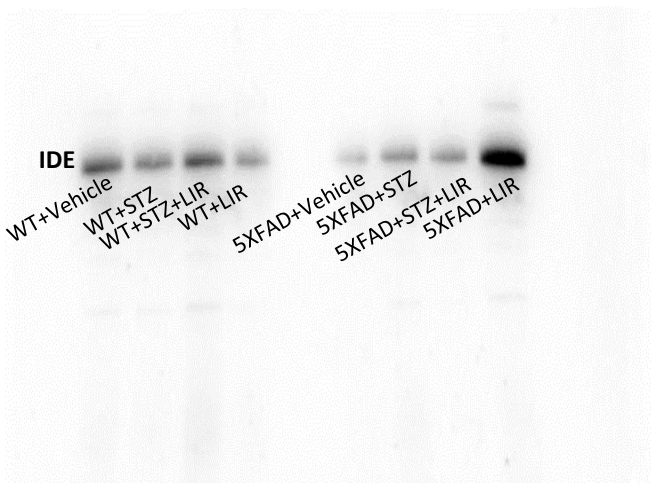

Figure 5 (A) GAPDH (Cortex)

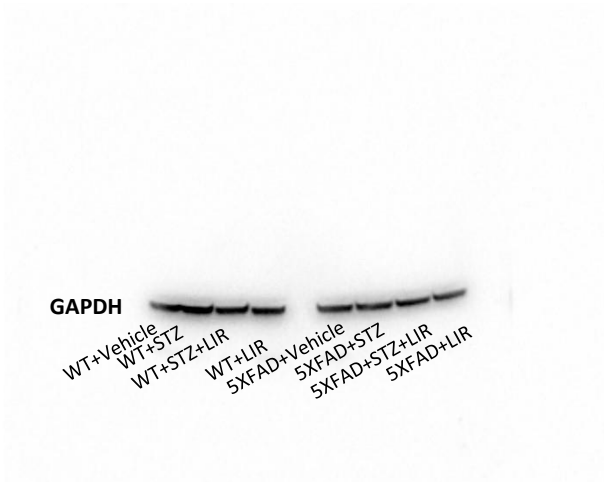

Figure 5 (B) pIR (Hippocampus)

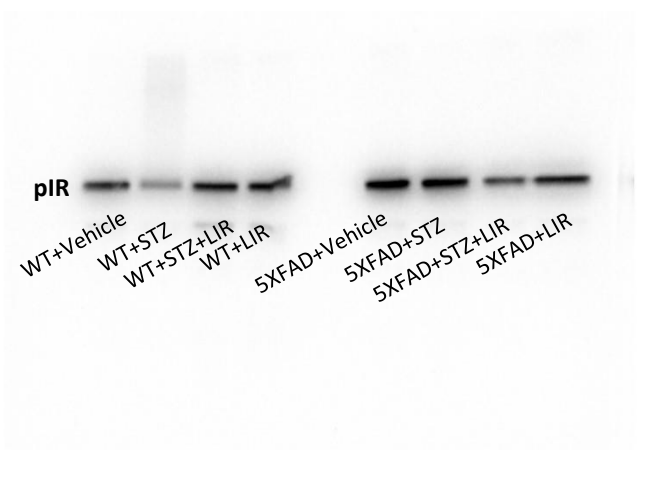

Figure 5 (B) IR (Hippocampus)

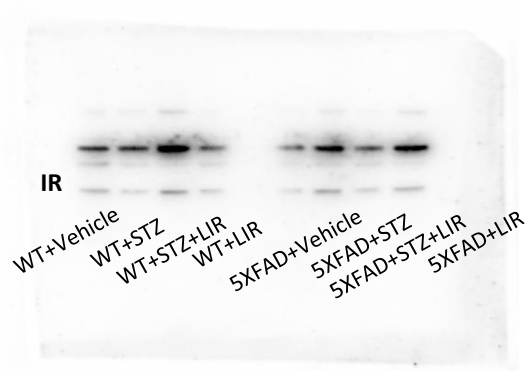

Figure 5 (B) GAPDH (Hippocampus)

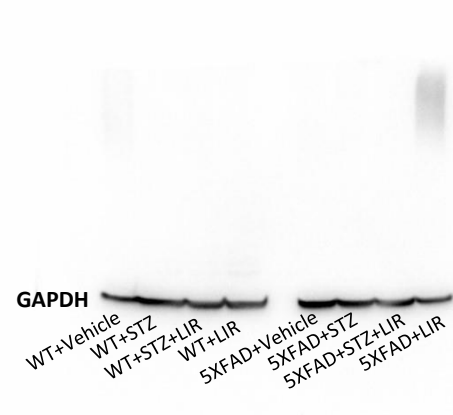

Figure 6 (A) pAKT (Cortex)

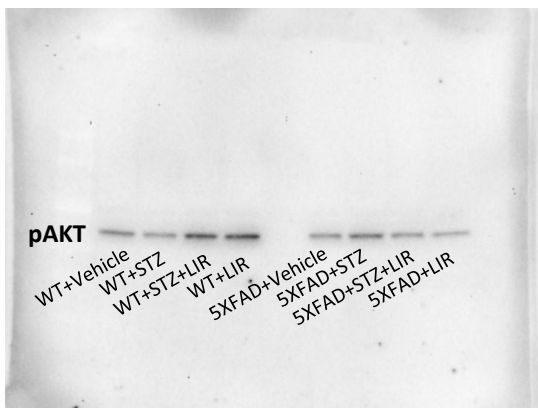

Figure 6 (A) AKT (Cortex)

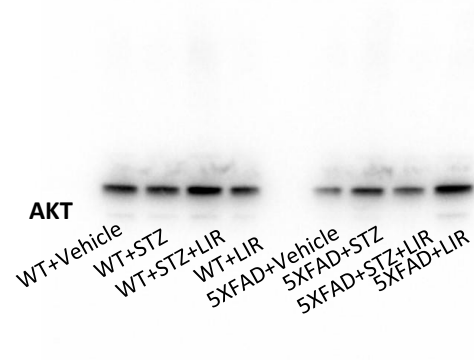

Figure 6 (B) AKT (Hippocampus)

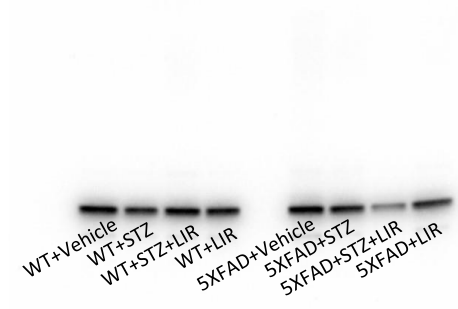

Figure 6 (B) pAKT (Hippocampus)

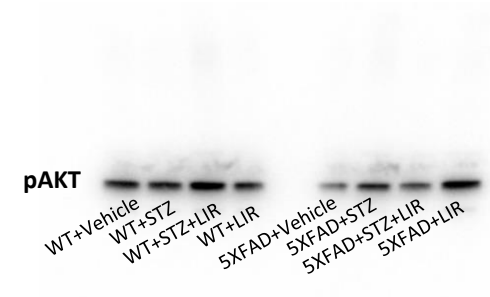

Figure 6 (A) GSK3 $\beta$  (Cortex)

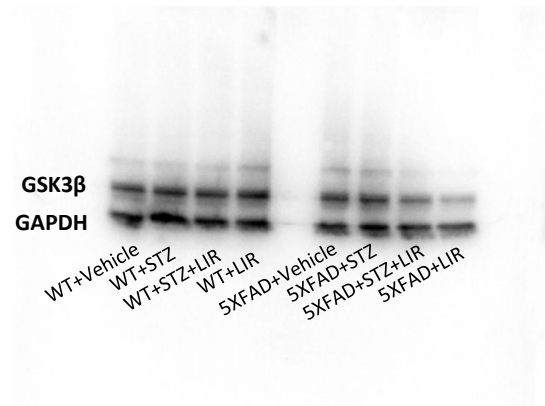

Figure 6 (B) pGSK3 $\beta$  (Hippocampus)

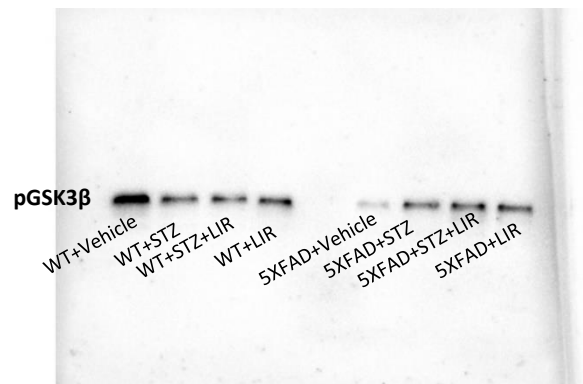

Figure 6 (B) GSK3 $\beta$  (Hippocampus)

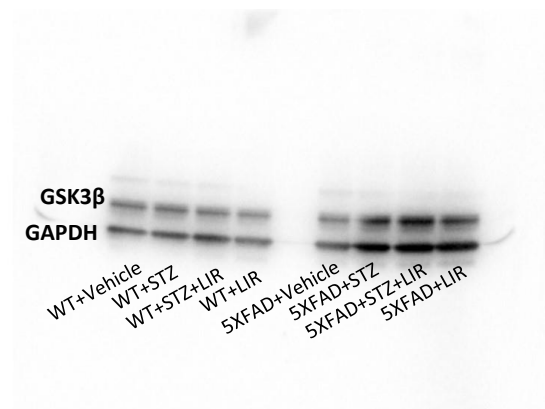

Figure 6 (A) pGSK3 $\beta$  (Cortex)

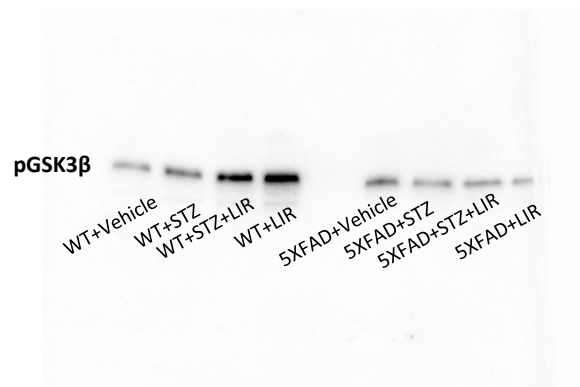

Supplement: s1 [file s1]
