# Supplementary material for: Liraglutide Has Anti-Inflammatory and Anti-Amyloid Properties in Streptozotocin-Induced and 5xFAD Mouse Models of Alzheimer’s Disease
Source: MDPI journal article supplement (doi:10.3390/ijms22020860), 2021-01-16
Supplement: s1 [file s1]

Table S1: List of all chemicals and antibodies used in the study.

| Chemicals/Antibody                 | Source | Company                                          | Catalog Number   |
|------------------------------------|--------|--------------------------------------------------|------------------|
| GFAP (1:500)                       | Rabbit | Cell Signaling (Danvers, MA, USA)                | 12389            |
| Iba-1 (1:3500)                     | Rabbit | Wako (Richmond, VA, USA)                         | 016-20001        |
| A $\beta$ (6E10, 1:500)            | Mouse  | Bio Legend (San Diego, CA, USA)                  | 803001           |
| IR (1:1000)                        | Rabbit | Cell Signaling (Danvers, MA, USA)                | 3025S            |
| PIR (1:1000)                       | Rabbit | Cell Signaling (Danvers, MA, USA)                | 3023S            |
| IDE (1:1000)                       | Rabbit | Cell Signaling (Danvers, MA, USA)                | RL2305311E       |
| AKT (1:1000)                       | Mouse  | Cell Signaling (Danvers, MA, USA)                | 2920S            |
| PAKT (1:1000)                      | Rabbit | Cell Signaling (Danvers, MA, USA)                | 4060S            |
| GSK3 $\beta$ (1:1000)              | Rabbit | Cell Signaling (Danvers, MA, USA)                | 1256S            |
| PGSK3 $\beta$ (1:1000)             | Rabbit | Cell Signaling (Danvers, MA, USA)                | 5558S            |
| GAPDH (1:1000)                     | Rabbit | Cell Signaling (Danvers, MA, USA)                | 2118S            |
| Biotinylated secondary anti-mouse  | Goat   | Vector Laboratory (Burlingame, CA, USA)          | U0924            |
| Alexa fluorophore 594 (1:1000)     |        | Molecular probes (Eugene, OR, USA)               | 898290           |
| HRP secondary anti-rabbit (1:1000) | Mouse  | Santa Cruz Biotechnology (Dallas, TX, USA)       | SC 2357          |
| HRP secondary anti-mouse (1:1000)  | Rabbit | Santa Cruz Biotechnology (Dallas, TX, USA)       | SC 358917        |
| Super signal West Femto Kit        |        | Thermo Fisher (Waltham, MA, USA)                 | 1856189          |
| ABC Stain kit                      |        | Vector Laboratory (Burlingame, CA, USA)          | PK-4000          |
| DAB kit                            |        | Vector Laboratory (Burlingame, CA, USA)          | SK4105           |
| Streptozotocin                     |        | Enzo Life Science (Farmingdale, NY, USA)         | ALX-380-010-M100 |
| Liraglutide                        |        | BACHEM AG (Bubendorf, Switzerland)               | 1055407          |
| DePex                              |        | Electron microscopy Sciences (Hatfield, PA, USA) | 13515            |

Note: The source of each chemical and antibody is listed, as well as the dilutions of the antibody used, along with their phosphorylation sites.
